# Supplementary material for: Pharmacist-Led Medication Evaluation Considering Pharmacogenomics and Drug-Induced Phenoconversion in the Treatment of Multiple Comorbidities: A Case Report
Source: MDPI journal article supplement (doi:10.3390/medicina57090955), 2021-09-10
Supplement: s1 [file s1]

### Supplementary Materials:

**Table SI.** Adapted CPIC Recommendations to Guide Hydrocodone Therapy Considering CYP2D6 Phenotype[11]

| CYP2D6 Phenotype.               | Implications and Clinical Interpretation                                                                                                                                                                         | Recommendations                                                                                                                                            |
|---------------------------------|------------------------------------------------------------------------------------------------------------------------------------------------------------------------------------------------------------------|------------------------------------------------------------------------------------------------------------------------------------------------------------|
| <b>Ultra-Rapid Metabolizer</b>  | Minimal evidence for pharmacokinetic or clinical effect.                                                                                                                                                         | No recommendation for hydrocodone therapy because of minimal evidence regarding adverse events or analgesia.                                               |
| <b>Normal Metabolizer</b>       | Normal hydromorphone formation.                                                                                                                                                                                  | Use hydrocodone label recommended age- or weight-specific dosing.                                                                                          |
| <b>Intermediate Metabolizer</b> | Minimal evidence for pharmacokinetic or clinical effect.                                                                                                                                                         | Use hydrocodone label recommended age- or weight-specific dosing. If no response and opioid use is warranted, consider non-codeine or non-tramadol opioid. |
| <b>Poor Metabolizer</b>         | Decreased metabolism of hydrocodone to active metabolite hydromorphone, but there is insufficient evidence to determine if these effects on pharmacokinetics translate into decreased analgesia or side effects. | Use hydrocodone label recommended age- or weight-specific dosing. If no response and opioid use is warranted, consider non-codeine or non-tramadol opioid. |

Abbreviations: CPIC: Clinical Pharmacogenetics Implementation Consortium; CYP: Cytochrome P450

**Table SII.** Adapted DPWG Recommendations to Guide Metoprolol Therapy Considering CYP2D6 Phenotype[58]

| CYP2D6 Phenotype.               | Implications and Clinical Interpretation                                                                                                                                                                                                                                  | Recommendations                                                                                                                                                                                                                                                                                                      |
|---------------------------------|---------------------------------------------------------------------------------------------------------------------------------------------------------------------------------------------------------------------------------------------------------------------------|----------------------------------------------------------------------------------------------------------------------------------------------------------------------------------------------------------------------------------------------------------------------------------------------------------------------|
| <b>Ultra-Rapid Metabolizer</b>  | The gene variation increases the conversion of metoprolol to inactive metabolites. This can increase the dose requirement. However, with a target dose of 200 mg/day, there was no effect on the blood pressure and hardly any effect on the reduction of the heart rate. | Use the maximum dose for the relevant indication as a target dose. If the effectiveness is still insufficient:<br>Increase the dose based on effectiveness and side effects to 2.5 times the standard dose or select an alternative.<br>Possible alternatives include:<br>• Heart failure: bisoprolol or carvedilol. |
| <b>Intermediate Metabolizer</b> | The gene variation reduces the conversion of metoprolol to inactive metabolites. However, the clinical consequences are limited mainly to the occurrence of asymptomatic bradycardia.                                                                                     | If a gradual reduction in heart rate is desired, or in the event of symptomatic bradycardia:<br>Increase the dose in smaller steps and/or prescribe no more than 50% of the standard dose.                                                                                                                           |
| <b>Poor Metabolizer</b>         |                                                                                                                                                                                                                                                                           | If a gradual reduction in heart rate is desired, or in the event of symptomatic bradycardia:                                                                                                                                                                                                                         |

---

Increase the dose in smaller steps  
and/or prescribe no more than  
25% of the standard dose.

---

Abbreviations: DPWG: Dutch Pharmacogenetics Working Group; CYP: Cytochrome P450

**Table SIII.** Adapted DPWG Recommendations to Guide Duloxetine Therapy Considering CYP2D6 Phenotype[59]

| CYP2D6<br>Phenotype.                                      | Implications and Clinical<br>Interpretation                                                         | Recommendations                                                                              |
|-----------------------------------------------------------|-----------------------------------------------------------------------------------------------------|----------------------------------------------------------------------------------------------|
| <b>Ultra-Rapid, Intermediate, or Poor<br/>Metabolizer</b> | Although plasma concentrations<br>of duloxetine may be affected, a<br>typical response is expected. | There are currently no dosing<br>recommendations for duloxetine<br>based on CYP2D6 genotype. |

Abbreviations: DPWG: Dutch Pharmacogenetics Working Group; CYP: Cytochrome P450
